# Supplementary material for: Leishmaniasis in Cameroon: what is known and is done so far? A protocol for systematic review
Source: HighWire-hosted journal article supplement (doi:10.1136/bmjopen-2020-047530), 2021-04-01
Supplement: bmjopen-2020-047530supp002_data_supplement.pdf [file bmjopen-2020-047530supp002_data_supplement.pdf]

**Table S1. Example of search strategy used in PubMed/Medline**

| Search # | PubMed search terms                                                                                                                                                                                                                                                         |
|----------|-----------------------------------------------------------------------------------------------------------------------------------------------------------------------------------------------------------------------------------------------------------------------------|
| #6       | (((((Leishmaniose) OR (Leishmania)) OR (Fièvre noir)) OR (Mouche du sable)) OR (Phlebotome)) AND (Cameroun)                                                                                                                                                                 |
| #5       | ((((((Leishmaniasis) OR (Kala-azar)) OR (Black fever)) OR (Leishmania)) OR (Sandflies)) OR (Phlebotomus)) OR (Phlebotomine)) AND (Cameroon)                                                                                                                                 |
| #4       | (((((Leishmaniose[Title/Abstract]) OR (Fièvre noir[Title/Abstract])) OR (Leishmania[Title/Abstract])) OR (Mouche du sable[Title/Abstract])) OR (Phlebotome[Title/Abstract])) AND (Cameroun[Title/Abstract])                                                                 |
| #3       | ((((((Leishmaniasis[Title/Abstract]) OR (Kala-azar[Title/Abstract])) OR (Black fever[Title/Abstract])) OR (Leishmania[Title/Abstract])) OR (Sandflies[Title/Abstract])) OR (Phlebotomus[Title/Abstract])) OR (Phlebotomine[Title/Abstract])) AND (Cameroon[Title/Abstract]) |
| #2       | (((((Leishmaniose[Title]) OR (Fièvre noir[Title])) OR (Leishmania[Title])) OR (Mouche du sable[Title])) OR (Phlebotome[Title])) AND (Cameroun[Title])                                                                                                                       |
| #1       | ((((((leishmaniasis[Title]) OR (Kala-azar[Title])) OR (Black fever[Title])) OR (Leishmania[Title])) OR (Sandflies[Title])) OR (Phlebotomine[Title])) OR (Phlebotomus[Title])) AND (Cameroon[Title])                                                                         |
